1     **Selection-free non-viral method revealed highly efficient CRISPR-Cas9 genome**  
2     **editing of human pluripotent stem cells guided by cellular autophagy**

3  
4             Michelle Surma<sup>1</sup>, Kavitha Anbarasu<sup>1,2</sup> and Arupratan Das<sup>1,2,3,4,5,\*</sup>

5  
6     <sup>1</sup>Department of Ophthalmology, Eugene and Marilyn Glick Eye Institute, Indiana  
7     University, Indianapolis, IN 46202, USA; <sup>2</sup>Department of Medical and Molecular  
8     Genetics, Indiana University, Indianapolis, IN 46202, USA; <sup>3</sup>Stark Neurosciences  
9     Research Institute, Indiana University, Indianapolis, IN 46202, USA; <sup>4</sup>Department of  
10    Biochemistry and Molecular Biology, Indiana University, Indianapolis, IN 46202, USA

11  
12    <sup>5</sup>Lead Contact

13    \*Correspondence: arupdas@iu.edu

14  
15    **SUMMARY**

16  
17    CRISPR-Cas9 mediated genome editing of human pluripotent stem cells (hPSCs)  
18    provides strong avenues for human disease modeling, drug discovery and cell  
19    replacement therapy. Genome editing of hPSCs is an extremely inefficient process and  
20    requires complex gene delivery and selection methods to improve edit efficiency which  
21    are not ideal for clinical applications. Here, we have shown a selection free simple  
22    lipofectamine based transfection method where a single plasmid encoding guide RNA  
23    (gRNA) and Cas9 selectively transfected hPSCs at the colony edges. Upon dissection  
24    and sequencing, the edge cells showed more than 30% edit frequency compared to the  
25    reported 3% rate under no selections. Increased cellular health of the edge cells as  
26    revealed by reduced autophagy gene-expressions is critical for such transfection pattern.  
27    Edge specific transfection was inhibited by blocking lysosomal activity which is essential  
28    for autophagy. Hence, our method provides robust scarless genome-editing of hPSCs  
29    which is ideal for translational research.

## 31 INTRODUCTION

32

33 Genome editing of hPSCs by CRISPR-Cas9 provides many unprecedented advantages,  
34 from introducing disease specific gene deletions to precise DNA base pair changes.  
35 Genome edited hPSCs are differentiated to the human cell of interest for disease  
36 modeling, drug screening, or cell replacement therapy, with potential use for personalized  
37 medicine (Saha and Jaenisch, 2009). Successful delivery of Cas9 gene and gRNA  
38 specific to the target gene is critical for gene editing in hPSCs. However, CRISPR-Cas9  
39 mediated genome editing of hPSCs is an extremely inefficient process with success rate  
40 less than 3% (Yang et al., 2013). To increase genome-editing efficiency in hPSCs, several  
41 approaches have been taken including: stable integration of a drug selection marker into  
42 the genome (Lombardo et al., 2007), transient selection (Sluch et al., 2018; Steyer et al.,  
43 2018), fluorescence-activated cell sorting (FACS) (Ding et al., 2013) and more recently a  
44 combination of electroporation and viral transduction based methods (Martin et al., 2019).  
45 While these methods have improved genome editing efficiency, they also possess  
46 unwanted consequences, such as permanent gene alterations through integration of  
47 selection markers which could disrupt the local transcriptional regulation and will make  
48 hPSCs incompatible for clinical applications. FACS based single cell sorting to enrich  
49 Cas9 expressing cells increased edit efficiency to 6.0% in hPSCs but with very low cell  
50 survival rate (Byrne and Church, 2015; Yang et al., 2013). Viral gene delivery methods  
51 require special skill in producing virus particles, which is a lengthy process and not ideal  
52 for most laboratories. Antibiotic selection to enrich the transfected cells activates innate  
53 immunity and genetic changes which are not ideal for downstream translational

54 applications (Mignon et al., 2015; Vandermeulen et al., 2011). Thus, there is a critical  
55 need for developing a CRISPR-Cas9 mediated genome editing technique for hPSCs  
56 without the need for any antibiotic selection, FACS sorting or complex viral transduction-  
57 based methods.

58  
59 To achieve this goal, here we first explored the differential transfection potential of stem  
60 cells within a hPSC colony and have identified that cells at the colony edges selectively  
61 got transfected due to increased cellular health compared to the cells at the center. Using  
62 a single plasmid containing gRNA/Cas9 and lipofectamine based transfection, we found  
63 very high Cas9 expression with more than 30% genome editing frequency through non-  
64 homologous end joining (NHEJ) at the edge cells compared to the center. This simple but  
65 highly efficient scarless genome editing technique of hPSCs is ideal for disease modeling  
66 research and clinical applications.

67

## 68 **RESULTS**

69

### 70 **Cells at the hPSC colony edges are selectively transfected by plasmid DNA**

71

72 We used a simple lipofectamine-based transfection to hPSCs which requires only mixing  
73 of the lipofectamine reagent and plasmid DNA containing Cas9/gRNA followed by  
74 addition to the cells. To identify if hPSC culture shows any cellular pattern for transfection  
75 which could be exploited to enrich the transfected cells, first we transfected H7 human  
76 embryonic stem cells (H7-hESCs) by CAG-mCherry plasmid at the single cell level or at

77 the colony stage which is formed by compacting several cells. Much to our surprise, we  
78 observed stem cells at the colony edge got selectively transfected but not cells the at  
79 colony center (Figure 1A), while single cell culture got transfected randomly with no such  
80 pattern (Figure 1B) as observed by the mCherry fluorescence. However, overall  
81 transfected cell population showed no difference between the single cell and colony  
82 stages when measured by flow cytometer (Figures 1C, 1D). To measure if stem cells at  
83 the colony center are not expressing mCherry and hence not transfected, we drew a line  
84 across the colony center through the edges and measured the fluorescence intensity  
85 profile on that line (Figure 1E). Indeed, we observed specific fluorescence intensity peaks  
86 on the line corresponding to the edges but not at the center (Figure 1F). This observation  
87 was further verified by measuring fluorescence intensity around the colony edges and  
88 centers which showed significantly high expression at the edge but not at the center cells  
89 (Figure 1G). To test if selective transfection of the colony edge cells is a cell type specific  
90 phenomenon, we transfected human H9-ESCs and induced pluripotent stem cell (EP1-  
91 iPSCs) (Bhise et al., 2013) colonies with CAG-mCherry plasmid. Indeed, we observed  
92 increased transfection of the peripheral cells for both the hPSC lines (Figure S1A, S1D).  
93 This observation was further verified by measuring fluorescence intensity profiles across  
94 the line through the colony center (Figure S1A, S1D) which showed specific intensity  
95 peaks at the colony edges but not at the center (Figure S1B, S1E). Similarly, fluorescence  
96 intensity measurements showed significantly high fluorescence at the edges compared  
97 to centers (Figure S1C, S1F). As hPSCs could be maintained in various media which  
98 could affect transfection efficiency, we tested the two most commonly used stem cell  
99 media mTeSR1 (mT) and mTeSRplus (mTp) for their effect on hPSC colony transfection

100 to further identify the optimum media for transfection. We found significantly higher  
101 transfection of H7-ESC colonies when cultured in the mT compared to the mTp media  
102 (Figure S2A, S2B) and maintained hPSCs in the mT for this study. However, cellular  
103 stemness marker expressions such as OCT4, NANOG, SSEA1, SSEA4, Alkaline  
104 Phosphatase (ALPL), SOX2, NOTCH1 and NESTIN did not alter between mT and mTp  
105 media (Figure S2C) suggesting stemness property of hPSCs was unaffected when  
106 cultured in either media. To test if selective transfection of the colony edge cells is specific  
107 to the lipofectamine based transfection, we transduced H7-ESC colonies with the  
108 lentivirus containing GFP vector. Interestingly, we observed stem cells throughout the  
109 colony got transduced as shown by GFP expression losing the morphological pattern  
110 (Figure S3). These data suggest lipofectamine based simple transfection of hPSC  
111 colonies selectively transfects edge cells, which could then be isolated to enhance  
112 CRISPR genome editing without the need of any viral transduction and antibiotic selection  
113 methods.

114

115 **Autophagy driven increased cellular health of hPSC colony edges caused**  
116 **increased cell transfection.**

117

118 To investigate the mechanism of selective transfection of hPSC colony edge cells, we  
119 asked if cells at the colony edges have more access to the nutrients from the media than  
120 the cells at the center, leading to improved cellular health and transfection. Cellular health  
121 could be measured by gene expression of the autophagy pathway genes as they get  
122 upregulated under stress (Kroemer et al., 2010). Activation of the autophagy pathway

123 genes help by removing damaged proteins and organelles under cellular stress (Anding  
124 and Baehrecke, 2017). Hence, we expect cells at the hPSC colony centers will have more  
125 autophagy gene expression than the edges. To measure this, we dissected out the H7-  
126 hESC cells from the colony edges and centers (Figure 2A) and measured gene  
127 expressions for a broad range of autophagy genes (Sha et al., 2018). Indeed, we found  
128 key autophagy genes such as ATG5, LC3B, GABARAP, GABARAPL1 and ATG13 are  
129 upregulated at the center compared to the edge cells (Figure 2B) suggesting improved  
130 cellular health of the edge cells. Of note, the dissected center portion of colony (Figure  
131 2A) also contain small portion of edges as dissection of only center cells are extremely  
132 difficult and growing colonies very large leads to colony fusions losing edge populations  
133 and spontaneous differentiation (Chen et al., 2014). Next, we asked whether the  
134 difference in cellular health between colony edge and center affects hPSC stemness  
135 property. To test this, we measured stemness marker gene expressions between the  
136 edge and center cells of H7-hESC colonies and found no significant difference (Figure  
137 2C), suggesting stem cells maintained their stemness property throughout the colony. If  
138 stem cells at the colony edges show increased health due to the greater exposure to  
139 nutrients leading to more transfection, we asked if creating new edges at the colony center  
140 would lead to selective transfection of stem cells at the newly formed edges. To test this,  
141 we scratched at the center of H7-hESC colonies to form new edges (Figure S4A) followed  
142 by transfection using CAG-mCherry plasmid. Indeed, we observed that cells at the newly  
143 formed edges at the former colony center got transfected as shown by the mCherry  
144 expression (Figure S4B). Of note, we also have seen some stem cell transfection inside  
145 these colony centers (Figure S4B), presumably due to the change in cellular contact upon

146 scratching through the middle of colonies, which is a mechanical perturbation. These  
147 suggest that stem cells at the colony centers maintained their stemness as well as the  
148 ability to get transfected upon exposure to new edges.

149  
150 It has been shown that cells at the hPSC colony edges experience strong myosin II  
151 molecular motor mediated contractility of the actin cytoskeleton leading to enhanced  
152 contraction of extracellular matrix (ECM) (Närvä et al., 2017; Rosowski et al., 2015). We  
153 asked if increased actomyosin contractility at the hPSC colony edges are responsible for  
154 selective transfection of these cells. To test this, we inhibited actomyosin contractility by  
155 the very potent myosin II ATPase inhibitor blebbistatin (Das et al., 2016) followed by  
156 transfection of H7-hESC colonies using CAG-mCherry plasmid. Interestingly, we  
157 observed that under myosin II inhibition cells at the edge as well as at the colony center  
158 got transfected, losing the edge specific transfection pattern as shown by mCherry  
159 expression (Figure 3A). We further observed an overall higher percentage of transfection  
160 under myosin II inhibition as measured by flow cytometry (Figure 3B, 3C) which also  
161 agrees with the previously reported data (Yen et al., 2014). Myosin inhibition presumably  
162 reduced cell-cell contact, making cells more exposed to the transfection reagent and  
163 causing cell transfection throughout the colony. Actomyosin contractility leads to the  
164 formation of thick F-actin stress fibers within the cells (Tojkander et al., 2012) which we  
165 observed in the edge cells of H7-ESC colonies with F-actin stained by fluorescence  
166 conjugated phalloidin, indicated by arrows (Figure 3D). We found successful inhibition of  
167 actomyosin contractility by blebbistatin as stress fibers disappeared at the hPSC colony  
168 edge cells (Figure 3D). Our data showed cells at the hPSC colony centers are under

169 stress with increased autophagy gene expressions compared to the edges. We asked if  
170 inhibition of the autophagy pathway would increase cellular stress throughout the hPSC  
171 colony leading to the inhibition of edge specific cell transfection. To test this, we inhibited  
172 the autophagy pathway by using a lysosome inhibitor bafilomycin, followed by CAG-  
173 mCherry plasmid transfection. Indeed, we found loss of colony edge specific transfection  
174 (Figure 3A) with reduced overall transfection under autophagy inhibition (Figure 3B, 3C)  
175 but no loss of F-actin stress fibers at the edge cells was observed (Figure 3D). These  
176 data suggest increased cellular health but not the actomyosin contractility of the hPSC  
177 colony edge cells is responsible for the selective transfection of those cells.

178

179 **Edge cells at the hPSC colonies showed very high efficiency CRISPR genome**  
180 **editing.**

181

182 Finally, we asked if selective transfection of the hPSC colony edge cells could be  
183 exploited to have high-efficient CRISPR-Cas9 genome editing. To test this, we  
184 transfected H7-hESC colonies using lipofectamine and a plasmid encoding gRNA under  
185 U6 promoter and SpCas9-2A-GFP under CAG promoter (Figure 4A). 2A is a non-  
186 translatable sequence (Sharma et al., 2012) and after translation, SpCas9 and GFP  
187 remain separate without effecting the protein activity. We hypothesized selective  
188 transfection of the hPSC colony edge cells would lead to enhanced Cas9 expression in  
189 those cells. To test this, we transfected H7-hESC colonies with the above plasmid and  
190 dissected out colony edge and center as shown in Figure 4B and measured Cas9  
191 expression in the respective populations. Indeed, we observed several fold increased



192 Cas9 expression in edge cells compared to the center (Figure 4C). This is very important  
193 as Cas9 delivery followed by gRNA-guided DNA double-strand break (DSB) leads to the  
194 insertion-deletions (INDELs) which is the rate-limiting step for obtaining high-frequency  
195 genome editing (Hendel et al., 2014, 2015).

196  
197 Next, we cloned gRNA into the Cas9 vector (Figure 4A) for mutating hypoxanthine  
198 phosphoribosyltransferase 1 (HPRT1). Upon transfection of the H7-hESCs colonies with  
199 this plasmid, we observed selective transfection of the cells at the colony edge by GFP  
200 expression (Figure 4D) similar to the CAG-mCherry plasmid. gRNA targets a specific  
201 gene sequence which allows the Cas9 enzyme to bind and create DNA DSB which cells  
202 repair by NHEJ. NHEJ leads to INDELs causing gene mutations. These mutations could  
203 be detected by PCR amplifying the DNA sequence around the gRNA target site followed  
204 by sanger sequencing and TIDE analysis (Brinkman et al., 2014) of the sequencing data.  
205 Since we observed high Cas9 expression in the edge cells, we hypothesized this will lead  
206 to high INDEL frequency. Indeed, by TIDE analysis we observed ~38% of edge cells with  
207 mutations (62% at 0 INDEL corresponds to 38% mutation) for HPRT1-gene in comparison  
208 to the center cells (Figure 4E, F). This is a significant improvement from the reported 3%  
209 mutation rate of hPSCs under non-viral and selection free conditions (Yang et al., 2013).  
210 This is remarkable as for the first time it allowed us to identify cells from stem cell colonies  
211 with very high-frequency genome editing without the need for any viral transduction,  
212 FACS sorting or antibiotic selections.

213

214 **DISCUSSION**

215  
216 Our work here demonstrated properties of hPSCs within a colony and how that could be  
217 used to achieve a selection and viral transduction free CRISPR-Cas9 genome editing  
218 technique with very high edit-frequency. This work will have three major impacts on the  
219 human disease modeling research; (1) the absence of any antibiotic selection marker will  
220 avoid integration of the marker gene and Cas9 into the hPSC genome avoiding unwanted  
221 scars or changes, (2) the simple lipofectamine reagent based transfection would allow us  
222 to use two or more plasmids with gRNAs targeted for different genes to have double or  
223 triple gene knock-out simultaneously, (3) this technique could also be used to create  
224 disease causing DNA base pair changes (point mutations) or correct mutations in the  
225 patient derived iPSCs by using Cas9 plasmid and single-stranded oligodeoxynucleotides  
226 (ssODNs) donor or donor vector. The lipofectamine-stem reagent is compatible for  
227 transfecting hPSCs with plasmids as well as ssODNs. Being able to seamlessly edit  
228 hPSCs would allow us to differentiate genome edited stem cells to the cell of interest and  
229 investigate the human disease mechanism, perform drug screening to identify cell  
230 protective agents and replace damaged cells with healthy cells in in-vivo models for cell  
231 replacement therapy. This will bring a paradigm shift in the understanding of genotype-  
232 phenotype relationship for a variety of human diseases.

233  
234 Our data suggested selective transfection of the colony edge cells is due to improved  
235 cellular health as revealed by low autophagy gene expressions compared to the center  
236 cells (Figure 2). However, it is also possible that the edge cells are more exposed to the  
237 transfection reagents than the center leading to increased transfection. This notion could

238 be supported by our colony scratch experiment where cells at the new edge in the middle  
239 of hPSC colonies got transfected (Figure S4). Our data (Figure 3C) as well as data from  
240 another group (Yen et al., 2014) have shown inhibiting actomyosin contractility increased  
241 hPSC colony transfection, which could be due to the reduced cell-cell contact within the  
242 colony centers exposing cells more to the transfection reagents. Thus, selective  
243 transfection of the hPSC colony edge cells could be due to the combination of increased  
244 cellular health and more exposure to the transfection reagents.

245

### 246 **Limitations of Study**

247 This study reveals a very simple but high-efficient genome editing technique in hPSCs  
248 with tremendous potential for a broad range of gene editing applications. As a next step,  
249 this technique could be used for introducing point mutations in hPSCs or correcting  
250 mutations in patient derived iPSCs. Our method here relies on the compact hPSC colony  
251 formation to have the distinct edge and center cell population. hPSCs typically grow  
252 forming these compact colonies; however if stem cells are grown in non-colony type  
253 monolayer (NCM) (Chen et al., 2012) they will not have distinct edge and center cell  
254 populations, and hence will limit this method application.

255

### 256 **ACKNOWLEDGEMENTS**

257

258 This work was supported by the grant from the NIH, United States (R00EY028223). We  
259 thank Dr. Donald Zack for kindly providing the H7-hESC, H9-hESC and EP1-iPSC human

260 pluripotent stem cell lines and Drs. Jason Meyer, David Wallace and Timothy Corson for  
261 valuable discussions.

262

## 263 **AUTHOR CONTRIBUTIONS**

264

265 M.S. and A.D. designed the experiments, analyzed data and wrote manuscript; M.S.  
266 performed experiments and analyzed data with the help of K.A; A.D. conceived and  
267 supervised the project and revised the manuscript.

268

## 269 **DECLARATION OF INTERESTS**

270

271 The authors declare no competing interests

272

## 273 **FIGURE LEGENDS**

274 **Figure 1: hESCs selectively got transfected at the colony edges but not at center.**

275 H7-hESCs after clump or single cell passage were transfected with CAG-mCherry (red  
276 fluorescence protein, RFP) plasmid and representative brightfield and RFP images were  
277 taken 24h after transfection. Shown are images of colony **(A)** and single cells **(B)**. **(C, D)**  
278 Transfected cells were dissociated by accutase and run through flow cytometer; shown  
279 are the distribution of the RFP-positive cells **(C)** and quantification for percentage of total  
280 RFP-positive cells **(D)** with 3 biological repeats for each condition. **(E-F)** Representative  
281 images of clump passaged colony 24h after transfection with CAG-mCherry plasmid **(E)**,  
282 line trace through the center of colony as shown in (E) shows fluorescence intensity peaks

283 at the edges **(F)** but not at the center. **(G)** Quantification of the fluorescence intensity of  
284 colony edges and centers from 58 colonies from 5 independent experiments. Error bars  
285 are SEM, Student's *t-test*, \*\*\*,  $p < 0.0005$ .

286

287 **Figure 2: hPSCs at the colony edges are healthier with reduced expression of**  
288 **autophagy genes.**

289 **(A)** H7-hESCs were cultured and colony edges and centers were dissected for qPCR. **(B,**  
290 **C)** qPCR analysis was done on the autophagy genes **(B)** and stemness marker genes  
291 **(C)**.  $\Delta\Delta Ct$  fold changes were measured relative to GAPDH and then to average  $\Delta Ct$  of  
292 center. Error bars are SEM, Student's *t-test*, \*,  $p$ -value  $< 0.05$ ,  $n=7-15$ .

293

294 **Figure 3: Inhibiting autophagy but not actomyosin contractility decreases**  
295 **transfection efficiency.**

296 **(A)** H7-hESC colonies were treated for 16h with blebbistatin or bafilomycin, then  
297 transfected with CAG-mCherry plasmid, shown are images 24h after transfection. **(B, C)**  
298 Single cell solutions were collected 24h after transfection and run through flow cytometer,  
299 shown are the distribution **(B)** and percentage of RFP-positive cells with-respect-to (w.r.t)  
300 control **(C)**. Error bars are SEM, One-way Anova with Dunnett's post hoc; \*\*,  $p$ -value  $<$   
301  $0.001$ ,  $n=3$ . **(D)** Shown are representative confocal immunofluorescence images of F-  
302 actin labelled with Alexa Fluor 488 Phalloidin and nucleus labeled with DAPI of H7-hESCs  
303 treated for 24h with the indicated drugs. Arrows indicate normal actin stress fiber bundles,  
304  $n=12$ .

305

306 **Figure 4: Enhanced CRISPR-Cas9 genome editing at the hPSC colony edges.**

307 **(A)** Map of plasmid (Addgene #79144) containing Cas9 and GFP cassettes. **(B, C)** H7-  
308 hESCs were transfected with the above plasmid, edges and centers were dissected after  
309 24h as shown in **(B)**, and Cas9 expression was measured by qPCR **(C)**. Data presented  
310 as  $\Delta$ Ct fold change relative to GAPDH. Error bars are SEM, Student's *t*-test, \*\*\*, p-value  
311 < 0.0005, n=6-9. **(D-F)** HPRT1-gRNA was inserted into the Addgene plasmid and then  
312 transfected into H7-hESCs, shown are representative images after 24h of transfection  
313 **(D)**. Colony edges and centers were dissected and sequenced for HPRT1 mutation,  
314 shown are representative sequencing chromatographs **(E)** and INDEL distribution of edge  
315 cells compared to the center cells by TIDE analysis **(F)**, n=12.

316

317 **STAR METHODS**

318

319 **Resource Availability**

320

321 **Lead Contact**

322 Further information and requests for resources and reagents should be directed to  
323 Arupratan Das ([arupdas@iu.edu](mailto:arupdas@iu.edu))

324

325 **Materials Availability**

326

327 Stem cells and plasmids are available from the Lead Contact's laboratory upon request  
328 and completion of the Material Transfer Agreement.

329 **Data and Code Availability**

330

331 This study did not generate any code or dataset.

332

333 **EXPERIMENTAL MODEL AND SUBJECT DETAILS:**

334

335 H7-ESCs, H9-ESCs (WiCell, <https://www.wicell.org/>), and EP1-iPSCs were grown in  
336 mTeSR1 media (mT) or mTeSR-plus media (mTp) in 5%CO<sub>2</sub>, 37°C incubator on matrigel  
337 (MG) coated plates. To obtain hPSC colonies, cells were passaged by clump passaging  
338 using Gentle Cell Dissociation Reagent (GD) after reaching 80% confluency. GD was  
339 added to cells for 4 min at 37°C, aspirated, then mT was used to resuspend colonies; cell  
340 suspension was mixed by pipetting 3-4 times to break up the colonies into small clumps  
341 and then seeded into new MG coated wells. Clump passaged colonies were cultured for  
342 an additional 2-3 days before experiments. For single cell passaging, cells were incubated  
343 with accutase for 10 min and then quenched with double volume of mT with 5 μM  
344 blebbistatin. These cells were pelleted by centrifuging at 150G for 5 min, and  
345 resuspended in media with blebbistatin, counted, and seeded at a density of 25,000/well  
346 of a 24-well plate.

347

348 **METHOD DETAILS:**

349

350 **hPSC transfection**

351

352 hPSCs were cultured as described above. The clump passaged colonies using GD were  
353 added to a larger volume of media and equally split into the wells of 24-well plates. Single  
354 cells after accutase passage were transfected 24h after seeding. GD cells were cultured  
355 for another 2-3 days until the colonies were established with distinct edges and centers  
356 with colony size around 1/10<sup>th</sup> the size of a 10x viewscreen at start of drug treatment or  
357 transfection. hPSC colonies were treated with 5  $\mu$ M blebbistatin, 50 nM bafilomycin, or  
358 equivalent volume of DMSO in mT for 16h. Cell transfections were done by mixing 2  $\mu$ l of  
359 lipofectamine stem (Invitrogen) and 600 ng of indicated plasmids in 50  $\mu$ l optidem by  
360 vortex. 10 min after vortexing, this mixture was added to the cell culture and incubated  
361 for 24h. Images were taken by the EVOS fluorescence microscope (Thermo Fisher  
362 Scientific). Using ImageJ software, fluorescence intensity was quantified by drawing a  
363 'donut' containing the colony edge, measured as the edge; the 'hole' of the donut was  
364 then measured as the center. Raw integrated density was divided by the total area to get  
365 the average intensity per area for both edge and center of each colony.

### 366 **Flow Cytometry**

367 For flow cytometry, cells were incubated in 40  $\mu$ l accutase for 10 min, then quenched with  
368 160  $\mu$ l mT with 5  $\mu$ M blebbistatin. This 200  $\mu$ l cell suspension was transferred into a 96-  
369 well round-bottom plate and read on the Attune NxT Acoustic Focusing Flow Cytometer  
370 (Thermo) equipped with Attune Auto Sampler (Thermo). Gating was used first to separate  
371 live cells, then to separate RFP-positive from the live cell population using the Attune NxT  
372 Software. Data were exported to excel or prism for analysis and plotting. Three or more  
373 biological repeats were performed for each condition.

### 374 **qPCR**



375 hPSCs were grown in mT and clump passaged using GD. For mT and mTp comparison,  
376 H7-hESCs were cultured in the respective media in 6-well plates for more than 2 weeks  
377 before starting the experiment. Cells at ~80% confluency were passaged and seeded on  
378 24-well MG coated plates for another 4-5 days until they reached ~70% confluency. Cells  
379 were incubated with 200  $\mu$ l accutase for 10 min and resuspended in 400  $\mu$ l mT with 5  $\mu$ M  
380 blebbistatin. Cells were then centrifuged at 150G for 5 min, media aspirated, and cell  
381 pellets stored at -20°C. For edge/center comparison, colony dissection was done two  
382 days after seeding using clump passaging. When colonies were grown to 1/4 of a 10x  
383 field size checked by EVOS, the edge was dissected out first, and then a slice from the  
384 center of the colony was collected as the center. Samples were collected into mT with 5  
385  $\mu$ M blebbistatin, with edges and centers from 10 distinct colonies collected into 1  
386 biological replicate, with 3 biological replicates total for edge and center. Samples were  
387 then centrifuged, media aspirated, and cell pellets stored at -20°C until cDNA preparation.  
388 RNA extraction was done following the kit (Qiagen 74104) and 6  $\mu$ l of RNA was used to  
389 prepare cDNA (abm G492). cDNA concentration was measured using Nanodrop 2000c  
390 (Thermo) and stored at -80°C. qPCR primers were designed as explained in Table S1.  
391 qPCR was performed using Brightgreen (MasterMix-LR, abm) and 100 ng total cDNA in  
392 a 20  $\mu$ l reaction mixture using QuantStudio6 Flex RT PCR system (Applied Biosystems).  
393 GAPDH was used as a housekeeping gene in every plate to calculate the  $\Delta$ Ct values.  
394 The  $\Delta\Delta$ Ct was calculated with respect to the average  $\Delta$ Ct of colony center (edge vs.  
395 center) or mT (mT vs mTp).

## 396 **gRNA Cloning**

397 gRNA sequence targeting HPRT1 was obtained from Thermo Fisher (A32060), and then  
398 modified following the published protocol (Ran et al., 2013). gRNA was cloned after the  
399 U6 promoter sequence into a plasmid containing pCAG-SpCas9-GFP-U6-gRNA  
400 (Addgene #79144). 1 µg of plasmid was digested using 1 µl of Bbs1-HF in 1X cutsmart  
401 buffer in a total reaction volume of 50 µl. This was then run in 1% agarose gel, and gel  
402 extracted following the kit (Zymo D4007).

403 10 µM of sense and antisense gRNA oligos were added to 1X T4 DNA ligase reaction  
404 buffer with 0.5 µl of T4 Polynucleotide Kinase for a final volume of 10 µl and annealed in  
405 the thermocycler (37°C for 30 min, then 95°C for 5 min, and ramp down to 25°C at  
406 5°C/min). The annealed gRNA was ligated into the gel extracted plasmid by adding 50 µg  
407 of the Bbs1-HF digested plasmid, 1 µl of annealed oligo duplex, and 5 µl of 2x quick  
408 ligation buffer for a final volume of 10 µl. 1 µl of quick ligase was then added and the  
409 reaction incubated at room temperature for 10 min. 2 µl of this plasmid was added to 50  
410 µl of Top10 *E coli* and kept in ice for 5 min. The bacteria were then heat shocked to  
411 promote uptake of the plasmid at 42°C for 45 seconds before being placed back into ice  
412 for 2 min. 250 µl SOC media was added to the bacteria and incubated in a 37°C shaker  
413 for 1h before being spread onto LB-agar plates with Carbenicillin (50 µg/ml) and incubated  
414 overnight at 37°C. The next day, colonies were picked and grown into LB-broth with  
415 Carbenicillin overnight at 37°C under shaking. Plasmid was extracted following the kit  
416 (Zymo D4210), and concentration was measured using nanodrop. Plasmids were  
417 sequenced by Eurofins to check gRNA integration.

## 418 **Confocal Imaging**

419 hPSCs were seeded using GD passaging on MG-coated glass bottom dishes (MatTek).  
420 The next day, 5 $\mu$ M blebbistatin, 50 nM bafilomycin, or equivalent volume of DMSO was  
421 added to the culture media for 24h. Media was aspirated and cells were washed with 1X  
422 PBS, and then fixed with 4% Paraformaldehyde for 30 min at 37°C. Cells were washed  
423 once and then stored in PBS at 4°C until immunostained. Fixed cells were permeabilized  
424 with 0.5% Triton-X100 in PBS for 5 min and then washed in PBST (1X PBS + 0.1%  
425 Tween20) for 3 times for 5 minutes each. Cells were blocked with PBS containing 5%  
426 donkey serum and 0.1% Tween 20 (blocking buffer). Alexa Fluor 488 conjugated  
427 Phalloidin (4U/ml) was added to the blocking buffer and incubated with the cells for 1h in  
428 the dark at room temperature. Dishes were washed with 1X PBST 3 times for 5 minutes  
429 each, with 1.43  $\mu$ M DAPI added to the second wash. Cells were stored in 1x PBS while  
430 being imaged on Zeiss LSM700 with 63x/1.4 oil objective. Analysis was done using  
431 ImageJ with maximum projections of DAPI channel and the middle confocal slice of the  
432 Phalloidin labelled F-actin channel of the z-stacks.

### 433 **CRISPR-Cas9 genome editing of hESCs**

434 H7-hESC colonies were grown and transfected with the plasmid containing HPRT1-gRNA  
435 and Cas9 (gRNA cloning protocol) using 600 ng of plasmid with 50  $\mu$ l optimem and 2  $\mu$ l  
436 lipofectamine stem (Invitrogen). Colony dissection was performed 24h after transfection;  
437 edge and center samples were collected and plated into mT with 5  $\mu$ M blebbistatin in a  
438 96 well MG-coated plate, with each colony piece in its own well. After 24h, media was  
439 changed to mT without blebbistatin, with culture continuing for another 7-10 days with mT  
440 changed daily. After cells had grown sufficiently, media was aspirated and 30  $\mu$ l of quick  
441 extraction buffer was added to each well and a pipet was used to mix and scrape any

442 cells from the plate and transfer them into PCR tubes. Samples were then vortexed, spun  
443 down, and heated at 65°C for 10 min followed by 95°C for 5 min to extract DNA. After  
444 which the concentration was measured on a nanodrop and 50-200 ng of DNA was used  
445 with Phusion-Flash mastermix to PCR amplify the DNA sequence around the HPRT1  
446 gRNA target site. The PCR product was run in 1.5% agarose gel with Ethidium Bromide,  
447 and gel extracted following the kit (Zymo D4007). Extracted DNA was then sent for  
448 sequencing with Eurofins and analyzed with TIDE analysis software (<https://tide.nki.nl/>)  
449 where CRISPR edge samples were compared to the respective centers.

450

#### 451 **Lentivirus**

452 H7-hESCs at ~80% confluency were clump passaged using GD and seeded into 96-well  
453 MG coated wells. The next day, cell counting was done from a well using accutase  
454 mediated single cell dissociation. Lentivirus (LV) (Life Technologies Cat # A32060) with  
455 viral vector containing P<sub>U6</sub>-HPRT1(gRNA)-P<sub>EFS</sub>-GFP was added at multiplicity of infection  
456 (MOI) of 10 for each well. LV was added through mT media containing 8 µg/mL polybrene  
457 and the plate was centrifuged at 800 G at room temperature for 1h before incubating at  
458 37°C, 5% CO<sub>2</sub> incubator overnight. The next day, media with lentivirus was removed and  
459 replaced with normal mT; mT was changed every following day and GFP signal was  
460 observed over time.

#### 461 **Quantification and Statistical analysis:**

462

463 All data presented are mean ± SEM. For statistical analysis between two independent  
464 conditions a Student's *t-test* was performed in Microsoft Excel; for more than two

465 conditions, one-way Anova with Dunnett's multiple comparison post hoc test was  
466 performed using GraphPad Prism 9.0 software.

467

## 468 REFERENCES

469

470 Anding, A.L., and Baehrecke, E.H. (2017). Cleaning House: Selective Autophagy of  
471 Organelles. *Dev. Cell* 41, 10–22.

472 Bhise, N.S., Wahlin, K.J., Zack, D.J., and Green, J.J. (2013). Evaluating the potential of  
473 poly(beta-amino ester) nanoparticles for reprogramming human fibroblasts to become  
474 induced pluripotent stem cells. *Int. J. Nanomedicine* 8, 4641–4658.

475 Brinkman, E.K., Chen, T., Amendola, M., and Van Steensel, B. (2014). Easy  
476 quantitative assessment of genome editing by sequence trace decomposition. *Nucleic  
477 Acids Res.* 42.

478 Byrne, S.M., and Church, G.M. (2015). CRISPR-mediated gene targeting of human  
479 induced pluripotent stem cells. *Curr. Protoc. Stem Cell Biol.* 2015, 5A.8.1-5A.8.22.

480 Chen, K.G., Mallon, B.S., Hamilton, R.S., Kozhich, O.A., Park, K., Hoepfner, D.J.,  
481 Robey, P.G., and McKay, R.D.G. (2012). Non-colony type monolayer culture of human  
482 embryonic stem cells. *Stem Cell Res.* 9, 237–248.

483 Chen, K.G., Mallon, B.S., McKay, R.D.G., and Robey, P.G. (2014). Human pluripotent  
484 stem cell culture: Considerations for maintenance, expansion, and therapeutics. *Cell  
485 Stem Cell* 14, 13–26.

486 Das, A., Fischer, R.S., Pan, D., and Waterman, C.M. (2016). YAP nuclear localization in  
487 the absence of cell-cell contact is mediated by a filamentous actin-dependent, Myosin

488 Iland Phospho-YAP-independent pathway during extracellular matrix mechanosensing.  
489 *J. Biol. Chem.* *291*, 6096–6110.

490 Ding, Q., Regan, S.N., Xia, Y., Oostrom, L.A., Cowan, C.A., and Musunuru, K. (2013).  
491 Enhanced efficiency of human pluripotent stem cell genome editing through replacing  
492 TALENs with CRISPRs. *Cell Stem Cell* *12*, 393–394.

493 Hendel, A., Kildebeck, E.J., Fine, E.J., Clark, J.T., Punjya, N., Sebastiano, V., Bao, G.,  
494 and Porteus, M.H. (2014). Quantifying genome-editing outcomes at endogenous loci  
495 with SMRT sequencing. *Cell Rep.* *7*, 293–305.

496 Hendel, A., Bak, R.O., Clark, J.T., Kennedy, A.B., Ryan, D.E., Roy, S., Steinfeld, I.,  
497 Lunstad, B.D., Kaiser, R.J., Wilkens, A.B., et al. (2015). Chemically modified guide  
498 RNAs enhance CRISPR-Cas genome editing in human primary cells. *Nat. Biotechnol.*  
499 *33*, 985–989.

500 Kroemer, G., Mariño, G., and Levine, B. (2010). Autophagy and the Integrated Stress  
501 Response. *Mol. Cell* *40*, 280–293.

502 Lombardo, A., Genovese, P., Beausejour, C.M., Colleoni, S., Lee, Y.L., Kim, K.A.,  
503 Ando, D., Urnov, F.D., Galli, C., Gregory, P.D., et al. (2007). Gene editing in human  
504 stem cells using zinc finger nucleases and integrase-defective lentiviral vector delivery.  
505 *Nat. Biotechnol.* *25*, 1298–1306.

506 Martin, R.M., Ikeda, K., Cromer, M.K., Uchida, N., Nishimura, T., Romano, R., Tong,  
507 A.J., Lemgart, V.T., Camarena, J., Pavel-Dinu, M., et al. (2019). Highly Efficient and  
508 Marker-free Genome Editing of Human Pluripotent Stem Cells by CRISPR-Cas9 RNP  
509 and AAV6 Donor-Mediated Homologous Recombination. *Cell Stem Cell* *24*, 821-828.e5.

510 Mignon, C., Sodoyer, R., and Werle, B. (2015). Antibiotic-free selection in

511 biotherapeutics: Now and forever. *Pathogens* 4, 157–181.

512 Närvä, E., Stubb, A., Guzmán, C., Blomqvist, M., Balboa, D., Lerche, M., Saari, M.,  
513 Otonkoski, T., and Ivaska, J. (2017). A Strong Contractile Actin Fence and Large  
514 Adhesions Direct Human Pluripotent Colony Morphology and Adhesion. *Stem Cell*  
515 *Reports* 9, 67–76.

516 Ran, F.A., Hsu, P.D., Wright, J., Agarwala, V., Scott, D.A., and Zhang, F. (2013).  
517 Genome engineering using the CRISPR-Cas9 system. *Nat. Protoc.* 8, 2281–2308.

518 Rosowski, K.A., Mertz, A.F., Norcross, S., Dufresne, E.R., and Horsley, V. (2015).  
519 Edges of human embryonic stem cell colonies display distinct mechanical properties  
520 and differentiation potential. *Sci. Rep.* 5.

521 Saha, K., and Jaenisch, R. (2009). Technical Challenges in Using Human Induced  
522 Pluripotent Stem Cells to Model Disease. *Cell Stem Cell* 5, 584–595.

523 Sha, Z., Schnell, H.M., Ruoff, K., and Goldberg, A. (2018). Rapid induction of p62 and  
524 GAB ARA PL1 upon proteasome inhibition promotes survival before autophagy  
525 activation. *J. Cell Biol.* 217, 1757–1776.

526 Sharma, P., Yan, F., Doronina, V.A., Escuin-Ordinas, H., Ryan, M.D., and Brown, J.D.  
527 (2012). 2A peptides provide distinct solutions to driving stop-carry on translational  
528 recoding. *Nucleic Acids Res.* 40, 3143–3151.

529 Sluch, V.M., Chamling, X., Wenger, C., Duan, Y., Rice, D.S., and Zack, D.J. (2018).  
530 Highly efficient scarless knock-in of reporter genes into human and mouse pluripotent  
531 stem cells via transient antibiotic selection. *PLoS One* 13.

532 Steyer, B., Bu, Q., Cory, E., Jiang, K., Duong, S., Sinha, D., Steltzer, S., Gamm, D.,  
533 Chang, Q., and Saha, K. (2018). Scarless Genome Editing of Human Pluripotent Stem

534 Cells via Transient Puromycin Selection. *Stem Cell Reports* 10, 642–654.

535 Tojkander, S., Gateva, G., and Lappalainen, P. (2012). Actin stress fibers - Assembly,  
536 dynamics and biological roles. *J. Cell Sci.* 125, 1855–1864.

537 Vandermeulen, G., Marie, C., Scherman, D., and Pr at, V. (2011). New generation of  
538 plasmid backbones devoid of antibiotic resistance marker for gene therapy trials. *Mol.*  
539 *Ther.* 19, 1942–1949.

540 Yang, L., Guell, M., Byrne, S., Yang, J.L., De Los Angeles, A., Mali, P., Aach, J., Kim-  
541 Kiselak, C., Briggs, A.W., Rios, X., et al. (2013). Optimization of scarless human stem  
542 cell genome editing. *Nucleic Acids Res.* 41, 9049–9061.

543 Yen, J., Yin, L., and Cheng, J. (2014). Enhanced non-viral gene delivery to human  
544 embryonic stem cells via small molecule-mediated transient alteration of the cell  
545 structure. *J. Mater. Chem. B* 2, 8098–8105.

546



**Figure 1. hESCs selectively get transfected at the colony edges but not center.**

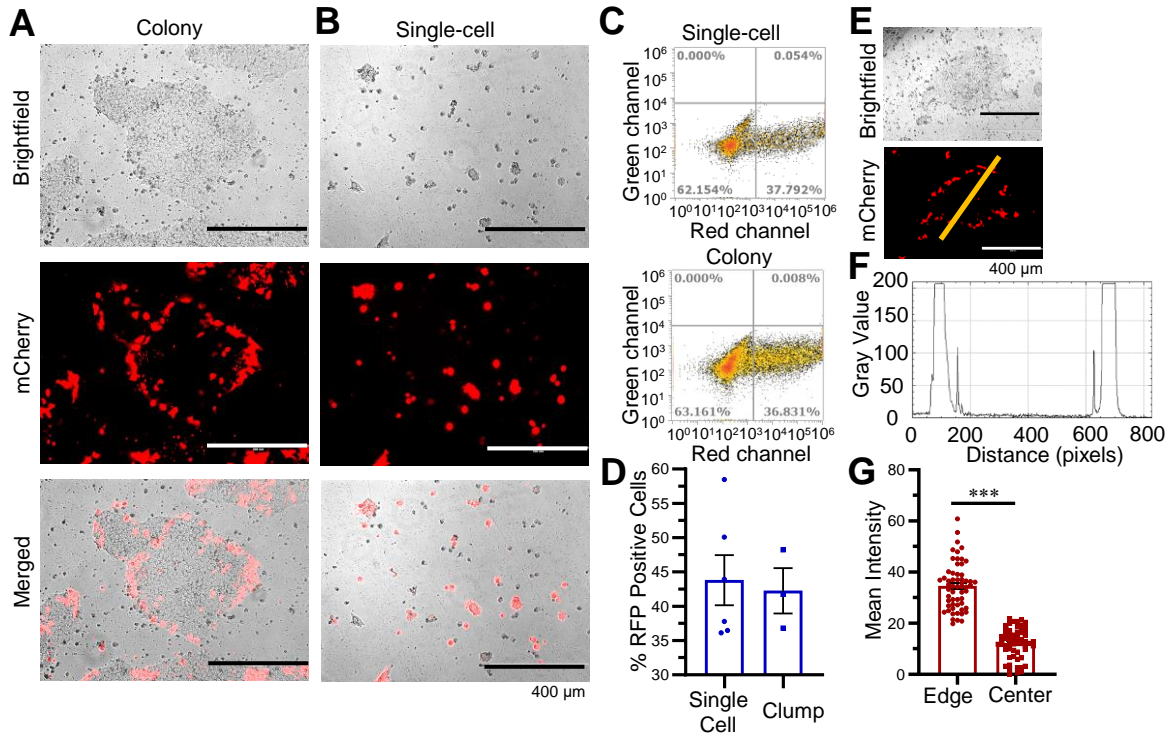

**Figure 2. hPSCs at the colony edges are healthier with reduced expression of autophagy genes.**

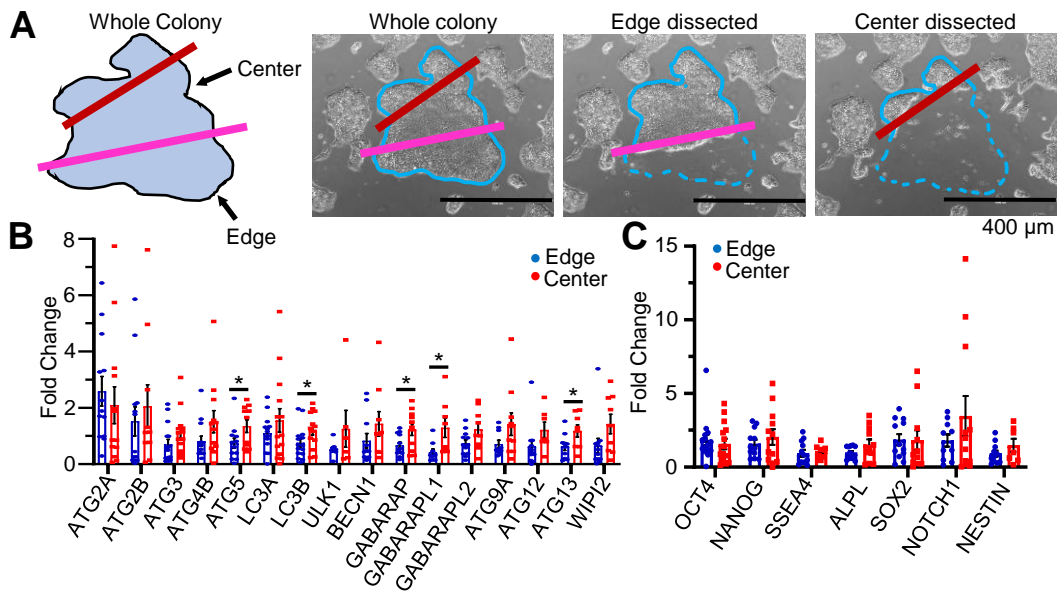

**Figure 3. Inhibiting autophagy but not actomyosin contractility decreases transfection efficiency.**

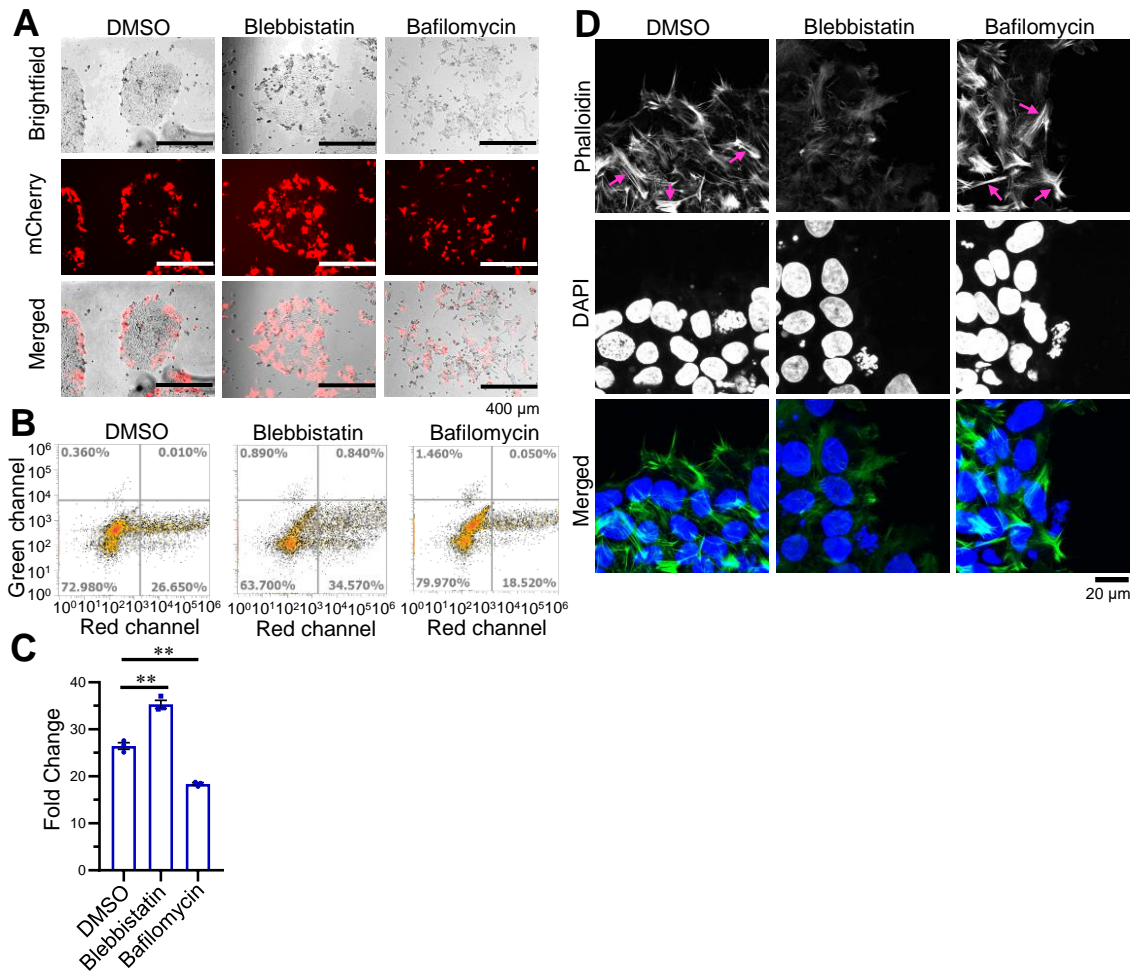

**Figure 4. Enhanced CRISPR-Cas9 genome editing at the hPSC colony edges.**

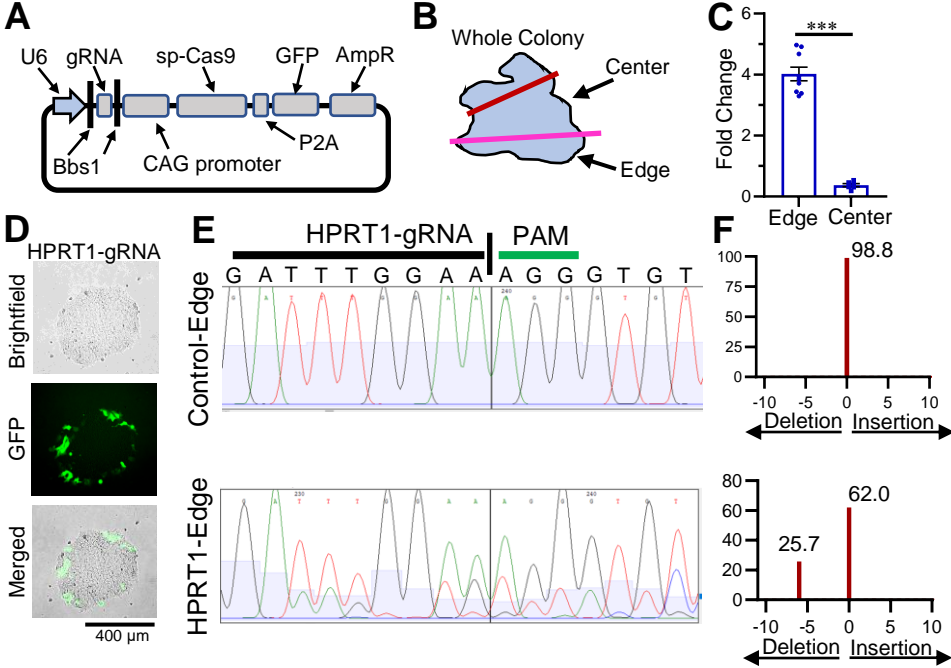

## KEY RESOURCES TABLE

| REAGENT or RESOURCE                                             | SOURCE                       | IDENTIFIER        |
|-----------------------------------------------------------------|------------------------------|-------------------|
| <b>Antibodies</b>                                               |                              |                   |
| Alexa Fluor 488 Phalloidin                                      | Invitrogen                   | Cat# A12379       |
| <b>Bacterial and Virus Strains</b>                              |                              |                   |
| Invitrogen™ One Shot™ TOP10 Chemically Competent <i>E. coli</i> | Fisher Scientific            | Cat# C404003      |
| <b>Chemicals, Peptides, and Recombinant Proteins</b>            |                              |                   |
| Matrigel                                                        | Corning                      | Cat# CB40230      |
| Gentle Cell Dissociation Reagent                                | Stem Cell Technology         | Cat# 7174         |
| mTeSR1                                                          | Stem Cell Technology         | Cat# 85850        |
| mTeSR-Plus                                                      | Stem Cell Technology         | Cat# 5825         |
| Accutase                                                        | Sigma                        | Cat# A6964        |
| Blebbistatin                                                    | Sigma                        | Cat# B0560        |
| Bafilomycin                                                     | Sigma                        | Cat# B1793        |
| DAPI                                                            | Molecular Probes             | Cat# D1206        |
| DMSO                                                            | Sigma                        | Cat# 276855       |
| Lipofectamine Stem                                              | Invitrogen                   | Cat# STEM00003    |
| Optimem                                                         | Gibco                        | Cat# 31985070     |
| Paraformaldehyde 16% solution, EM grade                         | Electron Microscopy Sciences | Cat# 15710        |
| Triton-X-100                                                    | Sigma                        | Cat# T8787        |
| Donkey Serum                                                    | Sigma                        | Cat# D9663        |
| Tween-20                                                        | Sigma                        | Cat# P9416        |
| Polybrene                                                       | Sigma                        | Cat# TR-1003-G    |
| Bbs1-HF                                                         | New England BioLabs          | Cat# R3539S       |
| Cutsmart Buffer                                                 | New England BioLabs          | Cat# B7204S       |
| T4 DNA Ligase Reaction Buffer                                   | New England BioLabs          | Cat# B0202S       |
| T4 Polynucleotide Kinase (PNK)                                  | New England BioLabs          | Cat# M0201S       |
| Quick Ligation Buffer                                           | New England BioLabs          | Cat# B2200        |
| Quick Ligase                                                    | New England BioLabs          | Cat# M2200S       |
| SOC media                                                       | Fisher Scientific            | Cat# BP974010X5   |
| Carbenicillin                                                   | Sigma                        | Cat# C1389        |
| LB Broth (Miller)                                               | Sigma                        | Cat# L3522        |
| LB broth with agar (Miller)                                     | Sigma                        | Cat# L3147        |
| Quick Extraction Buffer                                         | Epicentre                    | Cat# QE09050      |
| Phusion Flash Mastermix                                         | Fisher Scientific            | Cat# F548L        |
| Agarose                                                         | Sigma                        | Cat# A9539        |
| Ethidium Bromide                                                | Sigma                        | Cat# E1510        |
| <b>Critical Commercial Assays</b>                               |                              |                   |
| RNeasy Mini Kit                                                 | Qiagen                       | Cat# 74104        |
| 5x all-in-one RT MasterMix (with AccuRTGenomic DNA Removal kit) | applied biological materials | Cat# G492         |
| BrightGreen 2x qPCR MasterMix-Low ROX                           | applied biological materials | Cat# MasterMix-LR |
| ZymoPURE™ Plasmid Miniprep Kit                                  | Zymo                         | Cat# D4210        |
| Zymoclean Gel DNA Recovery Kit                                  | Zymo                         | Cat# D4007        |

|                                                                                                                     |                                                                                               |                               |
|---------------------------------------------------------------------------------------------------------------------|-----------------------------------------------------------------------------------------------|-------------------------------|
| Experimental Models: Cell Lines                                                                                     |                                                                                               |                               |
| H7-hESCs, H9-hESCs                                                                                                  | WiCell; Sluch et al., 2018                                                                    |                               |
| EP1-iPSCs                                                                                                           | Bhise et al., 2013                                                                            |                               |
| Oligonucleotides                                                                                                    |                                                                                               |                               |
| HPRT1-gRNA-Forward                                                                                                  | ThermoFisher website; alterations following Ran et al., 2013                                  | CACCGATTATGCT<br>GAGGATTTGGAA |
| HPRT1-gRNA-Reverse                                                                                                  | ThermoFisher website; alterations following Ran et al., 2013                                  | AAACTTCCAAATC<br>CTCAGCATAATC |
| gRNA plasmid sequencing                                                                                             |                                                                                               | CGCCAGCAACGC<br>GGCCTTTTTACGG |
| HPRT1-PCR-Forward; sequencing                                                                                       | ThermoFisher website                                                                          | TACACGTGTGAAC<br>CAACCCG      |
| HPRT1-PCR-Reverse                                                                                                   | ThermoFisher website                                                                          | GTAAGGCCCTCCT<br>CTTTATTT     |
| Primers for qPCR                                                                                                    | Supplemental Table S1                                                                         |                               |
| Recombinant DNA                                                                                                     |                                                                                               |                               |
| pCAG-mCherry plasmid                                                                                                | Addgene                                                                                       | Cat# 108685                   |
| pCAG-SpCas9-P2A-GFP-U6-gRNA                                                                                         | Addgene                                                                                       | Cat# 79144                    |
| pCAG-SpCas9-P2A-GFP-U6-HPRT1                                                                                        | This paper                                                                                    | N/A                           |
| LentiArray™ CRISPR Positive Control Lentivirus, human HPRT, with GFP (P <sub>U6</sub> -HPRT1-P <sub>EFS</sub> -GFP) | ThermoFisher (Life Technologies)                                                              | Cat# A32060                   |
| Software and Algorithms                                                                                             |                                                                                               |                               |
| ImageJ                                                                                                              | NIH                                                                                           |                               |
| Attune NxT Software                                                                                                 | ThermoFisher                                                                                  |                               |
| Prism version 9                                                                                                     | GraphPad                                                                                      |                               |
| Zen Microscope Software                                                                                             | Zeiss                                                                                         |                               |
| Genescript                                                                                                          | <a href="https://www.genscript.com/">https://www.genscript.com/</a>                           |                               |
| Primer3                                                                                                             | <a href="https://primer3.ut.ee/">https://primer3.ut.ee/</a>                                   |                               |
| PrimerBank                                                                                                          | <a href="https://pga.mgh.harvard.edu/primerbank/">https://pga.mgh.harvard.edu/primerbank/</a> |                               |
| TIDE analysis software                                                                                              | <a href="https://tide.nki.nl/">https://tide.nki.nl/</a>                                       |                               |
